# Supplementary material for: Comparison of Pan-Lyssavirus RT-PCRs and Development of an Improved Protocol for Surveillance of Non-RABV Lyssaviruses
Source: MDPI journal article supplement (doi:10.3390/v15030680), 2023-03-04
Supplement: s1 [file s1]

**Supplementary Table S1. The complete list of the sequences and the minimal number of mismatches observed between each primers/probes set and target sequence**

| Phylogroup | Species | Accession number | LN34 |        |     | (n) LN34 |        |      | JW12/N165-146 |     | Hemi-nested RT-PCR |     |         |     | Convventional RT-PCR |      |
|------------|---------|------------------|------|--------|-----|----------|--------|------|---------------|-----|--------------------|-----|---------|-----|----------------------|------|
|            |         |                  |      |        |     |          |        |      |               |     | 1 round            |     | 2 round |     |                      |      |
|            |         |                  | FWs  | Probes | REV | FWs      | Probes | REVs | FW            | REV | FW                 | REV | FW      | REV | FW                   | REVs |
| I          | ABLV    | AF418014         | 2    | 0      | 2   | 0        | 0      | 1    | 0             | 2   | 0                  | 1   | 0       | 1   | 0                    | 1    |
| I          | ARAV    | NC_020808        | 3    | 0      | 1   | 0        | 0      | 1    | 0             | 1   | 0                  | 1   | 0       | 0   | 0                    | 1    |
| I          | BBLV    | LT839617         | 2    | 0      | 2   | 0        | 0      | 2    | 2             | 3   | 2                  | 0   | 2       | 0   | 0                    | 1    |
| I          | BBLV    | LT839642         | 2    | 0      | 1   | 0        | 0      | 1    | 1             | 1   | 1                  | 0   | 1       | 1   | 0                    | 0    |
| I          | BBLV    | LT839643         | 2    | 0      | 2   | 0        | 0      | 2    | 2             | 3   | 2                  | 0   | 2       | 0   | 0                    | 1    |
| I          | BBLV    | LT839644         | 2    | 0      | 1   | 0        | 0      | 1    | 1             | 1   | 1                  | 0   | 1       | 1   | 0                    | 0    |
| I          | BBLV    | MF043188         | 2    | 0      | 1   | 1        | 0      | 1    | 2             | 2   | 2                  | 0   | 2       | 0   | 0                    | 1    |
| I          | BBLV    | NC_025251        | 2    | 0      | 1   | 0        | 0      | 1    | 1             | 1   | 1                  | 0   | 1       | 1   | 0                    | 0    |
| I          | DUVV    | EU293120         | 1    | 0      | 1   | 0        | 0      | 1    | 0             | 1   | 0                  | 0   | 0       | 0   | 0                    | 0    |
| I          | DUVV    | EU623444         | 1    | 0      | 1   | 0        | 0      | 1    | 0             | 1   | 0                  | 0   | 0       | 0   | 0                    | 1    |
| I          | DUVV    | JN986749         | 0    | 0      | 1   | 0        | 0      | 1    | 0             | 1   | 0                  | 0   | 0       | 1   | 0                    | 0    |
| I          | DUVV    | NC_020810        | 1    | 0      | 1   | 0        | 0      | 1    | 0             | 1   | 0                  | 0   | 0       | 0   | 0                    | 0    |
| I          | EBLV-1  | EU293109         | 2    | 0      | 0   | 1        | 0      | 0    | 0             | 0   | 0                  | 0   | 0       | 0   | 0                    | 0    |
| I          | EBLV-1  | EU293112         | 1    | 0      | 0   | 0        | 0      | 0    | 0             | 0   | 0                  | 0   | 0       | 0   | 0                    | 0    |
| I          | EBLV-1  | EU626551         | 2    | 0      | 0   | 1        | 0      | 0    | 0             | 0   | 0                  | 0   | 0       | 0   | 0                    | 0    |
| I          | EBLV-1  | EU626552         | 2    | 0      | 0   | 1        | 0      | 0    | 0             | 0   | 0                  | 0   | 0       | 0   | 0                    | 0    |
| I          | EBLV-1  | KF155003         | 2    | 0      | 0   | 1        | 0      | 0    | 0             | 0   | 0                  | 0   | 0       | 0   | 0                    | 0    |
| I          | EBLV-1  | KP241939         | 2    | 0      | 0   | 1        | 0      | 0    | 0             | 0   | 0                  | 0   | 0       | 0   | 0                    | 0    |
| I          | EBLV-1  | LT839608         | 1    | 0      | 1   | 0        | 0      | 1    | 0             | 1   | 0                  | 0   | 0       | 0   | 0                    | 0    |
| I          | EBLV-1  | LT839609         | 1    | 0      | 0   | 0        | 0      | 0    | 0             | 0   | 0                  | 0   | 0       | 0   | 0                    | 0    |
| I          | EBLV-1  | LT839610         | 2    | 0      | 0   | 1        | 0      | 0    | 0             | 0   | 0                  | 0   | 0       | 0   | 0                    | 0    |
| I          | EBLV-1  | LT839612         | 1    | 0      | 0   | 0        | 0      | 0    | 0             | 0   | 0                  | 0   | 0       | 0   | 0                    | 0    |
| I          | EBLV-1  | LT839613         | 2    | 0      | 0   | 1        | 0      | 0    | 0             | 0   | 0                  | 0   | 0       | 0   | 0                    | 0    |
| I          | EBLV-1  | LT839614         | 2    | 0      | 0   | 1        | 0      | 0    | 0             | 0   | 0                  | 0   | 0       | 0   | 0                    | 0    |
| I          | EBLV-1  | MF187802         | 2    | 0      | 0   | 1        | 0      | 0    | 0             | 0   | 0                  | 0   | 0       | 0   | 0                    | 0    |
| I          | EBLV-1  | MF187804         | 1    | 0      | 0   | 0        | 0      | 0    | 0             | 0   | 0                  | 0   | 0       | 0   | 0                    | 0    |
| I          | EBLV-1  | MF187805         | 1    | 0      | 0   | 0        | 0      | 0    | 0             | 0   | 0                  | 0   | 0       | 0   | 0                    | 0    |
| I          | EBLV-1  | MF187808         | 1    | 0      | 0   | 0        | 0      | 0    | 0             | 0   | 0                  | 0   | 0       | 0   | 0                    | 0    |
| I          | EBLV-1  | MF187809         | 2    | 0      | 0   | 1        | 0      | 0    | 0             | 0   | 0                  | 0   | 0       | 0   | 0                    | 0    |
| I          | EBLV-1  | MF187810         | 1    | 0      | 0   | 0        | 0      | 0    | 0             | 0   | 0                  | 0   | 0       | 0   | 0                    | 0    |
| I          | EBLV-1  | MF187813         | 1    | 0      | 0   | 0        | 0      | 0    | 0             | 0   | 0                  | 0   | 0       | 0   | 0                    | 0    |
| I          | EBLV-1  | MF187814         | 1    | 0      | 0   | 0        | 0      | 0    | 0             | 0   | 0                  | 0   | 0       | 0   | 0                    | 0    |
| I          | EBLV-1  | MF187815         | 1    | 0      | 0   | 0        | 0      | 0    | 0             | 0   | 0                  | 0   | 0       | 0   | 0                    | 0    |
| I          | EBLV-1  | MF187817         | 1    | 0      | 0   | 0        | 0      | 0    | 0             | 0   | 0                  | 0   | 0       | 0   | 0                    | 0    |
| I          | EBLV-1  | MF187818         | 1    | 0      | 0   | 0        | 0      | 0    | 0             | 0   | 0                  | 0   | 0       | 0   | 0                    | 0    |
| I          | EBLV-1  | MF187819         | 1    | 0      | 0   | 0        | 0      | 0    | 0             | 0   | 0                  | 0   | 0       | 0   | 0                    | 0    |
| I          | EBLV-1  | MF187820         | 1    | 0      | 0   | 0        | 0      | 0    | 0             | 0   | 0                  | 0   | 0       | 0   | 0                    | 0    |
| I          | EBLV-1  | MF187821         | 2    | 0      | 0   | 1        | 0      | 0    | 0             | 0   | 0                  | 0   | 0       | 0   | 0                    | 0    |

[illegible]

| Phylogroup | Species | Accession number | LN34 |        |     | (n) LN34 |        |      | JW12/N165-146 |     | Hemi-nested RT-PCR |     |         |     | Convventional RT-PCR |      |
|------------|---------|------------------|------|--------|-----|----------|--------|------|---------------|-----|--------------------|-----|---------|-----|----------------------|------|
|            |         |                  |      |        |     |          |        |      |               |     | 1 round            |     | 2 round |     |                      |      |
|            |         |                  | FWs  | Probes | REV | FWs      | Probes | REVs | FW            | REV | FW                 | REV | FW      | REV | FW                   | REVs |
| I          | EBLV-1  | OU524415         | 2    | 0      | 0   | 1        | 0      | 0    | 0             | 0   | 0                  | 0   | 0       | 0   | 0                    | 0    |
| I          | EBLV-1  | OU524419         | 2    | 0      | 0   | 1        | 0      | 0    | 0             | 0   | 0                  | 0   | 0       | 0   | 0                    | 0    |
| I          | EBLV-1  | OU524421         | 2    | 0      | 0   | 1        | 0      | 0    | 0             | 0   | 0                  | 0   | 0       | 0   | 0                    | 0    |
| I          | EBLV-1  | OU524423         | 2    | 0      | 0   | 1        | 0      | 0    | 0             | 0   | 0                  | 0   | 0       | 0   | 0                    | 0    |
| I          | EBLV-1  | OU524424         | 2    | 0      | 0   | 1        | 0      | 0    | 0             | 0   | 0                  | 0   | 0       | 0   | 0                    | 0    |
| I          | EBLV-1  | OU524427         | 1    | 0      | 0   | 0        | 0      | 0    | 0             | 0   | 0                  | 0   | 0       | 0   | 0                    | 1    |
| I          | EBLV-1  | OU524428         | 2    | 0      | 0   | 1        | 0      | 0    | 0             | 0   | 0                  | 0   | 0       | 0   | 0                    | 0    |
| I          | EBLV-1  | OU524429         | 2    | 0      | 0   | 1        | 0      | 0    | 0             | 0   | 0                  | 0   | 0       | 0   | 0                    | 0    |
| I          | EBLV-1  | OU524431         | 2    | 0      | 0   | 1        | 0      | 0    | 0             | 0   | 0                  | 0   | 0       | 0   | 0                    | 0    |
| I          | EBLV-1  | OU524432         | 2    | 0      | 0   | 1        | 0      | 0    | 0             | 0   | 0                  | 0   | 0       | 0   | 0                    | 0    |
| I          | EBLV-2  | EU293114         | 3    | 0      | 0   | 0        | 0      | 0    | 1             | 0   | 1                  | 0   | 1       | 0   | 0                    | 0    |
| I          | EBLV-2  | KF155004         | 3    | 0      | 0   | 0        | 0      | 0    | 1             | 0   | 1                  | 0   | 1       | 0   | 0                    | 0    |
| I          | EBLV-2  | KY688132         | 3    | 0      | 0   | 0        | 0      | 0    | 1             | 0   | 1                  | 0   | 1       | 0   | 0                    | 0    |
| I          | EBLV-2  | KY688133         | 3    | 0      | 0   | 0        | 0      | 0    | 1             | 0   | 1                  | 0   | 1       | 0   | 0                    | 0    |
| I          | EBLV-2  | KY688134         | 3    | 0      | 0   | 0        | 0      | 0    | 1             | 0   | 1                  | 0   | 1       | 0   | 0                    | 0    |
| I          | EBLV-2  | KY688135         | 3    | 0      | 0   | 0        | 0      | 0    | 1             | 0   | 1                  | 0   | 1       | 0   | 0                    | 0    |
| I          | EBLV-2  | KY688136         | 3    | 0      | 0   | 0        | 0      | 0    | 1             | 0   | 1                  | 0   | 1       | 0   | 0                    | 0    |
| I          | EBLV-2  | KY688137         | 3    | 0      | 0   | 0        | 0      | 0    | 1             | 0   | 1                  | 0   | 1       | 0   | 0                    | 0    |
| I          | EBLV-2  | KY688138         | 3    | 0      | 0   | 0        | 0      | 0    | 1             | 0   | 1                  | 0   | 1       | 0   | 0                    | 0    |
| I          | EBLV-2  | KY688139         | 3    | 0      | 0   | 0        | 0      | 0    | 1             | 0   | 1                  | 0   | 1       | 0   | 0                    | 0    |
| I          | EBLV-2  | KY688140         | 3    | 0      | 0   | 0        | 0      | 0    | 1             | 0   | 1                  | 0   | 1       | 0   | 0                    | 0    |
| I          | EBLV-2  | KY688141         | 3    | 0      | 0   | 0        | 0      | 0    | 1             | 0   | 1                  | 0   | 1       | 0   | 0                    | 0    |
| I          | EBLV-2  | KY688142         | 3    | 0      | 0   | 0        | 0      | 0    | 1             | 0   | 1                  | 0   | 1       | 0   | 0                    | 0    |
| I          | EBLV-2  | KY688143         | 3    | 0      | 0   | 0        | 0      | 0    | 1             | 0   | 1                  | 0   | 1       | 0   | 0                    | 0    |
| I          | EBLV-2  | KY688144         | 3    | 0      | 0   | 0        | 0      | 0    | 1             | 0   | 1                  | 0   | 1       | 0   | 0                    | 0    |
| I          | EBLV-2  | KY688145         | 3    | 0      | 0   | 0        | 0      | 0    | 1             | 0   | 1                  | 0   | 1       | 0   | 0                    | 0    |
| I          | EBLV-2  | KY688146         | 3    | 0      | 0   | 0        | 0      | 0    | 1             | 0   | 1                  | 0   | 1       | 0   | 0                    | 1    |
| I          | EBLV-2  | KY688147         | 3    | 0      | 0   | 0        | 0      | 0    | 1             | 0   | 1                  | 0   | 1       | 0   | 0                    | 0    |
| I          | EBLV-2  | KY688148         | 3    | 0      | 0   | 0        | 0      | 0    | 1             | 0   | 1                  | 0   | 1       | 0   | 0                    | 0    |
| I          | EBLV-2  | KY688149         | 3    | 0      | 0   | 0        | 0      | 0    | 1             | 0   | 1                  | 0   | 1       | 0   | 0                    | 0    |
| I          | EBLV-2  | KY688150         | 3    | 0      | 0   | 0        | 0      | 0    | 1             | 1   | 1                  | 0   | 1       | 0   | 0                    | 0    |
| I          | EBLV-2  | KY688151         | 2    | 0      | 0   | 1        | 0      | 0    | 1             | 0   | 1                  | 0   | 1       | 0   | 0                    | 0    |
| I          | EBLV-2  | KY688152         | 3    | 0      | 0   | 0        | 0      | 0    | 1             | 0   | 1                  | 0   | 1       | 0   | 0                    | 0    |
| I          | EBLV-2  | KY688153         | 3    | 0      | 0   | 0        | 0      | 0    | 1             | 0   | 1                  | 0   | 1       | 0   | 0                    | 0    |
| I          | EBLV-2  | KY688154         | 3    | 0      | 0   | 0        | 0      | 0    | 1             | 0   | 1                  | 0   | 1       | 0   | 0                    | 0    |
| I          | EBLV-2  | KY688155         | 3    | 0      | 0   | 0        | 0      | 0    | 1             | 0   | 1                  | 0   | 1       | 0   | 0                    | 0    |
| I          | EBLV-2  | KY688156         | 3    | 0      | 0   | 0        | 0      | 0    | 1             | 1   | 1                  | 0   | 1       | 0   | 0                    | 0    |
| I          | EBLV-2  | MG760848         | 3    | 0      | 0   | 0        | 0      | 0    | 1             | 0   | 1                  | 0   | 1       | 0   | 0                    | 0    |
| I          | EBLV-2  | NC_009528        | 3    | 0      | 1   | 0        | 0      | 1    | 1             | 1   | 1                  | 0   | 1       | 0   | 0                    | 0    |

[illegible]

| Phylogroup | Species            | Accession number | LN34 |        |     | (n) LN34 |        |      | JW12/N165-146 |     | Hemi-nested RT-PCR |     |         |     | Convventional RT-PCR |      |
|------------|--------------------|------------------|------|--------|-----|----------|--------|------|---------------|-----|--------------------|-----|---------|-----|----------------------|------|
|            |                    |                  |      |        |     |          |        |      |               |     | 1 round            |     | 2 round |     |                      |      |
|            |                    |                  | FWs  | Probes | REV | FWs      | Probes | REVs | FW            | REV | FW                 | REV | FW      | REV | FW                   | REVs |
| I          | RABV Africa        | KY210265         | 0    | 0      | 0   | 0        | 0      | 0    | 0             | 0   | 0                  | 0   | 0       | 1   | 0                    | 1    |
| I          | RABV Africa        | KY210268         | 0    | 0      | 0   | 0        | 0      | 0    | 0             | 0   | 0                  | 0   | 0       | 1   | 0                    | 1    |
| I          | RABV Africa        | KY210284         | 0    | 0      | 0   | 0        | 0      | 0    | 0             | 0   | 0                  | 0   | 0       | 1   | 0                    | 0    |
| I          | RABV Africa        | LC029889         | 0    | 0      | 0   | 0        | 0      | 0    | 0             | 0   | 0                  | 0   | 0       | 1   | 0                    | 1    |
| I          | RABV Africa        | MG458307         | 1    | 0      | 2   | 0        | 0      | 2    | 0             | 2   | 0                  | 0   | 0       | 1   | 0                    | 1    |
| I          | RABV Africa        | MG458318         | 0    | 0      | 0   | 0        | 0      | 0    | 0             | 0   | 0                  | 0   | 0       | 1   | 0                    | 0    |
| I          | RABV America North | AB645847         | 0    | 0      | 1   | 0        | 0      | 1    | 0             | 1   | 0                  | 0   | 0       | 0   | 0                    | 0    |
| I          | RABV America North | JQ685895         | 1    | 0      | 0   | 0        | 0      | 0    | 0             | 1   | 0                  | 0   | 0       | 0   | 0                    | 1    |
| I          | RABV America North | JQ685899         | 1    | 0      | 0   | 0        | 0      | 0    | 0             | 0   | 0                  | 0   | 0       | 1   | 0                    | 1    |
| I          | RABV America North | JQ685901         | 0    | 0      | 0   | 0        | 0      | 0    | 0             | 1   | 0                  | 0   | 0       | 0   | 0                    | 1    |
| I          | RABV America North | JQ685903         | 0    | 0      | 0   | 0        | 0      | 0    | 0             | 1   | 0                  | 0   | 0       | 0   | 0                    | 1    |
| I          | RABV America North | JQ685905         | 0    | 0      | 0   | 0        | 0      | 0    | 0             | 1   | 0                  | 0   | 0       | 0   | 0                    | 1    |
| I          | RABV America North | JQ685910         | 1    | 0      | 0   | 0        | 0      | 0    | 0             | 2   | 0                  | 0   | 0       | 0   | 0                    | 1    |
| I          | RABV America North | JQ685921         | 0    | 0      | 0   | 0        | 0      | 0    | 0             | 0   | 0                  | 0   | 0       | 0   | 0                    | 1    |
| I          | RABV America North | JQ685922         | 1    | 0      | 0   | 0        | 0      | 0    | 0             | 1   | 0                  | 0   | 0       | 0   | 0                    | 1    |
| I          | RABV America North | JQ685945         | 0    | 0      | 0   | 0        | 0      | 0    | 0             | 1   | 0                  | 0   | 0       | 0   | 0                    | 1    |
| I          | RABV America North | JQ685952         | 0    | 0      | 0   | 0        | 0      | 0    | 0             | 2   | 0                  | 0   | 0       | 1   | 0                    | 1    |
| I          | RABV America North | JQ685965         | 0    | 0      | 0   | 0        | 0      | 0    | 0             | 2   | 0                  | 0   | 0       | 1   | 0                    | 1    |
| I          | RABV America North | JQ685971         | 2    | 0      | 0   | 0        | 0      | 0    | 0             | 1   | 0                  | 0   | 0       | 0   | 0                    | 1    |
| I          | RABV America North | KU198460         | 0    | 0      | 0   | 0        | 0      | 0    | 0             | 0   | 0                  | 0   | 0       | 0   | 0                    | 0    |
| I          | RABV America North | KU198461         | 0    | 0      | 0   | 0        | 0      | 0    | 0             | 0   | 0                  | 0   | 0       | 0   | 0                    | 0    |
| I          | RABV America North | KU198472         | 0    | 0      | 0   | 0        | 0      | 0    | 0             | 0   | 0                  | 0   | 0       | 0   | 0                    | 0    |
| I          | RABV America North | KU198473         | 0    | 0      | 0   | 0        | 0      | 0    | 0             | 0   | 0                  | 0   | 0       | 0   | 0                    | 0    |
| I          | RABV America North | KU198479         | 0    | 0      | 0   | 0        | 0      | 0    | 0             | 0   | 0                  | 0   | 0       | 0   | 0                    | 0    |
| I          | RABV America North | KX036363         | 1    | 0      | 0   | 1        | 0      | 0    | 0             | 0   | 0                  | 0   | 0       | 0   | 0                    | 0    |
| I          | RABV America North | KX036366         | 1    | 0      | 0   | 1        | 0      | 0    | 0             | 0   | 0                  | 0   | 0       | 0   | 0                    | 0    |
| I          | RABV America North | KX148105         | 1    | 0      | 0   | 1        | 0      | 0    | 0             | 0   | 0                  | 0   | 0       | 0   | 0                    | 0    |
| I          | RABV America North | KY026417         | 0    | 0      | 0   | 0        | 0      | 0    | 0             | 1   | 0                  | 0   | 0       | 0   | 0                    | 1    |
| I          | RABV America North | KY026424         | 0    | 0      | 0   | 0        | 0      | 0    | 0             | 1   | 0                  | 0   | 0       | 0   | 0                    | 1    |
| I          | RABV America North | KY026427         | 0    | 0      | 0   | 0        | 0      | 0    | 0             | 1   | 0                  | 0   | 0       | 0   | 0                    | 1    |
| I          | RABV America North | MG458304         | 1    | 0      | 0   | 0        | 0      | 0    | 0             | 1   | 0                  | 0   | 0       | 0   | 0                    | 1    |
| I          | RABV America North | MK540739         | 0    | 0      | 0   | 0        | 0      | 0    | 0             | 1   | 0                  | 0   | 0       | 0   | 0                    | 1    |
| I          | RABV America North | MK540762         | 0    | 0      | 0   | 0        | 0      | 0    | 0             | 1   | 0                  | 0   | 0       | 0   | 0                    | 1    |
| I          | RABV America North | MK540821         | 0    | 0      | 0   | 0        | 0      | 0    | 0             | 1   | 0                  | 0   | 0       | 1   | 0                    | 1    |
| I          | RABV America South | AB362483         | 0    | 0      | 0   | 0        | 0      | 0    | 0             | 0   | 0                  | 0   | 0       | 0   | 0                    | 0    |
| I          | RABV America South | AB517659         | 0    | 0      | 0   | 0        | 0      | 0    | 0             | 0   | 0                  | 0   | 0       | 0   | 0                    | 0    |
| I          | RABV America South | AB519641         | 0    | 0      | 0   | 0        | 0      | 0    | 0             | 1   | 0                  | 0   | 0       | 0   | 0                    | 1    |
| I          | RABV America South | AB519642         | 1    | 0      | 0   | 1        | 0      | 0    | 0             | 1   | 0                  | 0   | 0       | 0   | 0                    | 1    |
| I          | RABV America South | EU293116         | 0    | 0      | 0   | 0        | 0      | 0    | 0             | 1   | 0                  | 0   | 0       | 0   | 0                    | 1    |
| I          | RABV America South | JQ685929         | 1    | 0      | 1   | 1        | 0      | 1    | 0             | 1   | 0                  | 0   | 0       | 0   | 0                    | 1    |

| Phylogroup | Species            | Accession number | LN34 |        |     | (n) LN34 |        |      | JW12/N165-146 |     | Hemi-nested RT-PCR |     |         |     | Convnetional RT-PCR |      |
|------------|--------------------|------------------|------|--------|-----|----------|--------|------|---------------|-----|--------------------|-----|---------|-----|---------------------|------|
|            |                    |                  |      |        |     |          |        |      |               |     | 1 round            |     | 2 round |     |                     |      |
|            |                    |                  | FWs  | Probes | REV | FWs      | Probes | REVs | FW            | REV | FW                 | REV | FW      | REV | FW                  | REVs |
| I          | RABV America South | JQ685953         | 0    | 0      | 1   | 0        | 0      | 1    | 0             | 2   | 0                  | 0   | 0       | 0   | 0                   | 1    |
| I          | RABV America South | JQ685954         | 1    | 0      | 1   | 1        | 0      | 1    | 0             | 1   | 0                  | 0   | 0       | 0   | 0                   | 1    |
| I          | RABV America South | JQ685963         | 0    | 0      | 0   | 0        | 0      | 0    | 0             | 1   | 0                  | 0   | 0       | 0   | 0                   | 1    |
| I          | RABV America South | JQ685975         | 0    | 0      | 0   | 0        | 0      | 0    | 0             | 0   | 0                  | 0   | 0       | 1   | 0                   | 1    |
| I          | RABV America South | KX148109         | 0    | 0      | 1   | 0        | 0      | 1    | 0             | 2   | 0                  | 0   | 0       | 0   | 0                   | 1    |
| I          | RABV Asia          | AB569299         | 0    | 0      | 0   | 0        | 0      | 0    | 0             | 1   | 0                  | 0   | 0       | 0   | 0                   | 1    |
| I          | RABV Asia          | AB635373         | 0    | 0      | 0   | 0        | 0      | 0    | 0             | 1   | 0                  | 0   | 0       | 0   | 0                   | 1    |
| I          | RABV Asia          | AB699220         | 0    | 0      | 0   | 0        | 0      | 0    | 0             | 0   | 0                  | 0   | 0       | 0   | 0                   | 0    |
| I          | RABV Asia          | AB981663         | 0    | 0      | 1   | 0        | 0      | 1    | 0             | 1   | 0                  | 0   | 0       | 0   | 0                   | 1    |
| I          | RABV Asia          | AB981664         | 0    | 0      | 1   | 0        | 0      | 1    | 0             | 1   | 0                  | 0   | 0       | 0   | 0                   | 1    |
| I          | RABV Asia          | EF437215         | 1    | 0      | 0   | 1        | 0      | 0    | 0             | 0   | 0                  | 0   | 0       | 0   | 0                   | 0    |
| I          | RABV Asia          | EU293111         | 0    | 0      | 1   | 0        | 0      | 1    | 0             | 1   | 0                  | 0   | 0       | 0   | 0                   | 1    |
| I          | RABV Asia          | FJ712193         | 0    | 0      | 1   | 0        | 0      | 1    | 0             | 2   | 0                  | 0   | 0       | 0   | 0                   | 0    |
| I          | RABV Asia          | GU345747         | 0    | 0      | 1   | 0        | 0      | 1    | 0             | 2   | 0                  | 0   | 0       | 0   | 0                   | 0    |
| I          | RABV Asia          | GU345748         | 0    | 0      | 0   | 0        | 0      | 0    | 0             | 2   | 0                  | 0   | 0       | 0   | 0                   | 0    |
| I          | RABV Asia          | HE802675         | 1    | 0      | 0   | 0        | 0      | 0    | 0             | 0   | 0                  | 0   | 0       | 0   | 0                   | 0    |
| I          | RABV Asia          | HE802676         | 2    | 0      | 0   | 1        | 0      | 0    | 0             | 0   | 0                  | 0   | 0       | 0   | 0                   | 0    |
| I          | RABV Asia          | JN609295         | 1    | 0      | 0   | 1        | 0      | 0    | 0             | 2   | 0                  | 0   | 0       | 0   | 0                   | 0    |
| I          | RABV Asia          | JN786877         | 0    | 0      | 1   | 0        | 0      | 1    | 0             | 1   | 0                  | 0   | 0       | 0   | 0                   | 1    |
| I          | RABV Asia          | JQ423952         | 1    | 0      | 1   | 1        | 0      | 1    | 0             | 2   | 0                  | 0   | 0       | 0   | 0                   | 0    |
| I          | RABV Asia          | JQ647510         | 0    | 0      | 1   | 0        | 0      | 1    | 0             | 2   | 0                  | 0   | 0       | 0   | 0                   | 0    |
| I          | RABV Asia          | JQ970481         | 0    | 0      | 1   | 0        | 0      | 1    | 0             | 2   | 0                  | 0   | 0       | 0   | 0                   | 0    |
| I          | RABV Asia          | JX088694         | 0    | 0      | 2   | 0        | 0      | 0    | 0             | 2   | 0                  | 0   | 0       | 0   | 0                   | 0    |
| I          | RABV Asia          | KC169986         | 0    | 0      | 1   | 0        | 0      | 1    | 0             | 2   | 0                  | 0   | 0       | 0   | 0                   | 1    |
| I          | RABV Asia          | KC762941         | 1    | 0      | 1   | 1        | 0      | 1    | 0             | 2   | 0                  | 0   | 0       | 0   | 0                   | 1    |
| I          | RABV Asia          | KF154998         | 0    | 0      | 0   | 0        | 0      | 0    | 0             | 0   | 0                  | 0   | 0       | 0   | 0                   | 0    |
| I          | RABV Asia          | KF155000         | 1    | 0      | 1   | 0        | 0      | 1    | 0             | 1   | 0                  | 0   | 0       | 0   | 0                   | 0    |
| I          | RABV Asia          | KF620487         | 0    | 0      | 1   | 0        | 0      | 1    | 0             | 3   | 0                  | 0   | 0       | 0   | 0                   | 1    |
| I          | RABV Asia          | KF620488         | 0    | 0      | 1   | 0        | 0      | 1    | 0             | 3   | 0                  | 0   | 0       | 0   | 0                   | 1    |
| I          | RABV Asia          | KF620489         | 0    | 0      | 1   | 0        | 0      | 1    | 0             | 3   | 0                  | 0   | 0       | 0   | 0                   | 1    |
| I          | RABV Asia          | KF726852         | 1    | 0      | 1   | 1        | 0      | 1    | 0             | 3   | 0                  | 0   | 0       | 0   | 0                   | 1    |
| I          | RABV Asia          | KF726853         | 1    | 0      | 1   | 1        | 0      | 1    | 0             | 2   | 0                  | 0   | 0       | 0   | 0                   | 0    |
| I          | RABV Asia          | KJ004416         | 1    | 0      | 1   | 1        | 0      | 1    | 0             | 2   | 0                  | 0   | 0       | 0   | 0                   | 0    |
| I          | RABV Asia          | KJ564280         | 0    | 0      | 1   | 0        | 0      | 1    | 0             | 2   | 0                  | 0   | 0       | 0   | 0                   | 0    |
| I          | RABV Asia          | KM016899         | 0    | 0      | 0   | 0        | 0      | 0    | 0             | 0   | 0                  | 0   | 0       | 0   | 0                   | 0    |
| I          | RABV Asia          | KY765901         | 0    | 0      | 0   | 0        | 0      | 0    | 0             | 0   | 0                  | 0   | 0       | 0   | 0                   | 0    |
| I          | RABV Europe        | AY956319         | 1    | 0      | 0   | 1        | 0      | 0    | 0             | 0   | 0                  | 0   | 0       | 0   | 0                   | 0    |
| I          | RABV Europe        | EU293115         | 0    | 0      | 0   | 0        | 0      | 0    | 0             | 0   | 0                  | 0   | 0       | 0   | 0                   | 0    |
| I          | RABV Europe        | JQ944704         | 0    | 0      | 0   | 0        | 0      | 0    | 0             | 0   | 0                  | 0   | 0       | 0   | 0                   | 0    |
| I          | RABV Europe        | JQ944705         | 0    | 0      | 0   | 0        | 0      | 0    | 0             | 0   | 0                  | 0   | 0       | 0   | 0                   | 0    |
| I          | RABV Europe        | JQ944706         | 0    | 0      | 0   | 0        | 0      | 0    | 0             | 0   | 0                  | 0   | 0       | 0   | 0                   | 0    |

| Phylogroup | Species     | Accession number | LN34 |        |     | (n) LN34 |        |      | JW12/N165-146 |     | Hemi-nested RT-PCR |     |         |     | Convetional RT-PCR |      |
|------------|-------------|------------------|------|--------|-----|----------|--------|------|---------------|-----|--------------------|-----|---------|-----|--------------------|------|
|            |             |                  |      |        |     |          |        |      |               |     | 1 round            |     | 2 round |     |                    |      |
|            |             |                  | FWs  | Probes | REV | FWs      | Probes | REVs | FW            | REV | FW                 | REV | FW      | REV | FW                 | REVs |
| I          | RABV Europe | JQ944707         | 1    | 0      | 0   | 1        | 0      | 0    | 1             | 0   | 1                  | 0   | 1       | 0   | 0                  | 0    |
| I          | RABV Europe | JQ944708         | 0    | 0      | 0   | 0        | 0      | 0    | 0             | 0   | 0                  | 0   | 0       | 0   | 0                  | 0    |
| I          | RABV Europe | KC595280         | 0    | 0      | 0   | 0        | 0      | 0    | 0             | 0   | 0                  | 0   | 0       | 0   | 0                  | 0    |
| I          | RABV Europe | KC595281         | 0    | 0      | 0   | 0        | 0      | 0    | 0             | 0   | 0                  | 0   | 0       | 0   | 0                  | 0    |
| I          | RABV Europe | KC595282         | 0    | 0      | 0   | 0        | 0      | 0    | 0             | 0   | 0                  | 0   | 0       | 0   | 0                  | 0    |
| I          | RABV Europe | KC595283         | 0    | 0      | 0   | 0        | 0      | 0    | 0             | 0   | 0                  | 0   | 0       | 0   | 0                  | 0    |
| I          | RABV Europe | KF154997         | 0    | 0      | 0   | 0        | 0      | 0    | 0             | 0   | 0                  | 0   | 0       | 0   | 0                  | 0    |
| I          | RABV Europe | KF154999         | 0    | 0      | 0   | 0        | 0      | 0    | 0             | 1   | 0                  | 0   | 0       | 0   | 0                  | 1    |
| I          | RABV Europe | KX148104         | 0    | 0      | 0   | 0        | 0      | 0    | 0             | 0   | 0                  | 0   | 0       | 0   | 0                  | 0    |
| I          | RABV Europe | LN879481         | 0    | 0      | 0   | 0        | 0      | 0    | 0             | 0   | 0                  | 0   | 0       | 0   | 0                  | 0    |
| I          | TBLV        | MF472709         | 2    | 0      | 0   | 1        | 0      | 0    | 0             | 1   | 0                  | 0   | 0       | 0   | 0                  | 1    |
| I          | TBLV        | MF472710         | 2    | 0      | 0   | 1        | 0      | 0    | 0             | 2   | 0                  | 0   | 0       | 0   | 0                  | 0    |
| II         | LBV         | EU259198         | 1    | 0      | 2   | 1        | 0      | 2    | 0             | 3   | 0                  | 1   | 0       | 1   | 0                  | 1    |
| II         | LBV         | EU293110         | 0    | 0      | 2   | 0        | 0      | 1    | 2             | 3   | 2                  | 1   | 2       | 0   | 1                  | 0    |
| II         | LBV         | GU170202         | 1    | 0      | 1   | 1        | 0      | 1    | 0             | 1   | 0                  | 1   | 0       | 0   | 0                  | 3    |
| II         | LBV         | JX901139         | 1    | 0      | 0   | 1        | 0      | 0    | 0             | 0   | 0                  | 1   | 0       | 0   | 0                  | 3    |
| II         | LBV         | NC_020807        | 1    | 0      | 2   | 1        | 0      | 2    | 0             | 3   | 0                  | 1   | 0       | 1   | 0                  | 1    |
| II         | MOKV        | EU293117         | 0    | 1      | 1   | 0        | 1      | 1    | 1             | 1   | 1                  | 0   | 1       | 0   | 0                  | 1    |
| II         | MOKV        | EU293118         | 0    | 1      | 1   | 0        | 1      | 1    | 1             | 1   | 1                  | 0   | 1       | 0   | 0                  | 0    |
| II         | MOKV        | KF155005         | 0    | 1      | 1   | 0        | 1      | 1    | 1             | 1   | 1                  | 0   | 1       | 0   | 0                  | 1    |
| II         | MOKV        | KF155006         | 0    | 1      | 2   | 0        | 1      | 2    | 1             | 2   | 1                  | 0   | 1       | 0   | 0                  | 0    |
| II         | MOKV        | KF155007         | 0    | 1      | 2   | 0        | 1      | 1    | 1             | 2   | 1                  | 0   | 1       | 0   | 0                  | 1    |
| II         | MOKV        | NC_006429        | 0    | 1      | 2   | 0        | 1      | 2    | 1             | 2   | 1                  | 0   | 1       | 0   | 0                  | 0    |
| II         | SHIBV       | NC_025365        | 2    | 0      | 1   | 2        | 0      | 1    | 0             | 1   | 0                  | 0   | 0       | 0   | 0                  | 1    |
| III        | IKOV        | NC_018629        | 6    | 1      | 0   | 0        | 1      | 0    | 2             | 1   | 2                  | 1   | 2       | 1   | 0                  | 1    |
| III        | LLEBV       | MG983927         | 5    | 0      | 2   | 0        | 0      | 0    | 0             | 2   | 0                  | 1   | 0       | 2   | 0                  | 1    |
| III        | LLEBV       | NC_031955        | 5    | 0      | 2   | 0        | 0      | 0    | 0             | 2   | 0                  | 1   | 0       | 2   | 0                  | 1    |
| III        | MBLV        | MW653808         | 3    | 0      | 1   | 1        | 0      | 1    | 0             | 2   | 0                  | 1   | 0       | 0   | 0                  | 2    |
| III        | WCBV        | MZ501949         | 2    | 0      | 1   | 0        | 0      | 0    | 0             | 2   | 0                  | 0   | 0       | 0   | 0                  | 1    |
| III        | WCBV        | NC_025377        | 2    | 0      | 1   | 0        | 0      | 0    | 0             | 2   | 0                  | 0   | 0       | 0   | 0                  | 1    |
