# Supplementary material for: Comparison of Pan-Lyssavirus RT-PCRs and Development of an Improved Protocol for Surveillance of Non-RABV Lyssaviruses
Source: MDPI journal article supplement (doi:10.3390/v15030680), 2023-03-04
Supplement: s1 [file s1]

**Table S3. Comparison of unique primer sequences created by combination of primers with low number of degenerated sites Vs. one primer including all degenerations**

| Name                                                                                         | S/As | Sequence (5' to 3')                        | Length (nt) | Number of unique primer sequences |
|----------------------------------------------------------------------------------------------|------|--------------------------------------------|-------------|-----------------------------------|
| FW1                                                                                          | S    | ACGCTTAACAAC <b>M</b> ARATCAAAGAA          | 24          | 4                                 |
| FW2                                                                                          | S    | ACGCTTAACAACAAAATC <b>A</b> DARAAG         | 25          | 6                                 |
| FW3                                                                                          | S    | ACGCTTAACGACAAAA <b>H</b> CAGARAAG         | 25          | 6                                 |
| FW4                                                                                          | S    | ACGCTTAACAGCTAAAA <b>A</b> CYAGAAG         | 25          | 2                                 |
| FW5                                                                                          | S    | ACGCTTAAC <b>A</b> RCAAAATCTTATAAG         | 25          | 2                                 |
| Total number of unique primer sequences using 5 FW primers with low number of degenerations  |      |                                            |             | <b>20</b>                         |
| Hypothetical FW primer using one highly degenerated primer                                   | S    | ACGCTTAAC <b>R</b> RCHARAH <b>M</b> HNADAA | 24          | <b>5184</b>                       |
| REV1*                                                                                        | As   | <b>C</b> MGGGTAYTTRTAYTCATAYTGRTC          | 25          | 64                                |
| REV2                                                                                         | As   | CTGGATATTTGTAYTCATAYTGATC                  | 25          | 4                                 |
| REV3                                                                                         | As   | CAGGATATTTATATTCATACTGGTC                  | 25          | 1                                 |
| Total number of unique primer sequences using 3 REV primers with low number of degenerations |      |                                            |             | <b>69</b>                         |
| Hypothetical REV primer using one highly degenerated primer                                  | As   | <b>C</b> MGGRTAYTTRTAYTCATAYTGRTC          | 25          | <b>128</b>                        |
| Probe1*                                                                                      | S    | AACAC <b>C</b> YCTACAATGGA                 | 17          | 2                                 |
| Probe2*                                                                                      | S    | AACACTACTACAATGGA                          | 17          | 1                                 |
| Total number of unique primer sequences using 2 probes with low number of degenerations      |      |                                            |             | <b>3</b>                          |
| Hypothetical Probe using one highly degenerated probe                                        | S    | AACAC <b>Y</b> YCTACAATGGA                 | 17          | <b>4</b>                          |

Oligonucleotides with \* are identical to original protocol. S: sense primers, As: antisense primers. Number of unique primer sequences generated by “primer3” in Geneious Prime® 2022.1.1 (Biomatters, Auckland, New Zealand. Degenerated sites are shown **in bold**.
